# Supplementary material for: Unravelling the diversity of glycoside hydrolase family 13 α-amylases from Lactobacillus plantarum WCFS1
Source: PubMed Central journal article supplement (PMC6815381; doi:10.1186/s12934-019-1237-3), 2019-10-26
Supplement: 12934_2019_1237_MOESM1_ESM.pdf [file 12934_2019_1237_MOESM1_ESM.pdf]

Figure S1

```

20 MQLAGIRHRPESED TAVLA AHQLQVRLQTARDDVAQVEILFADSYLW---QEGTTALE-R 56
21 -----MLNAWHL PVPFVKQS-K---DQL--LITLW---LTGEDPPQ-R 34
18 ----- 0
NI ----- 0
34 ---MT-----Q-DTALDMKDVELNELDQEKVPMAG 26
4 ---MLTP-----TQ-QVGLILQYLK-TRILDIYTPEQR 28
36 ----- 0
16 ----- 0
29 ----- 0
31 ----- 0
30 ----- 0
23 ----- 0
17 ----- 0
35 ---MEEEPNSVE-----LKQKAGHE-NNGFISDHD--G--RDEDKPEKG 36

20 RIMQ-----PGLATQGNQYWQTTLTVPTN--RVVYAFLITDT 91
21 IMLRT--EHDNEEMSVPMH-----KQRSQPQPGVTAWRAAIDLSSGQPRRRYSFKL--- 83
18 ----- 0
NI ----- 0
34 G-AGDSPNGGAEKNGV-VKVKLEDEDEKSQKFTGLSKEE--LLRVAGTPTWVR----- 75
4 AGI--EKSEDWRQFSRRMDTHFPKLMNELDSVYGNNEA----- 64
36 -----M----- 1
16 -----MTSDQNM----TS-DQHSETPPIRALLGEDEER--TA----- 30
29 ----- 0
31 ----- 0
30 ----- 0
23 ----- 0
17 ----- 0
35 KSRRSKEGDAHIYSVRIN-EVPEDSPPLKPYAGMPKDV--LLQFSNRPCYRI----- 86

20 IGATVGYGEGGFFDDVATNWQTVGNYFHMPY-----MHVSD-----AELPPAWVK 136
21 -----LWHDRQRWFTPOGF SRMPPARL-----EQFAVDV-----PDIGPQWAA 121
18 ----- 0
NI -----MARDTQT-QLR 10
34 ---VRWALLILFWLG-----WAGMLAGAVV I-----VQAPRCRPLPAMEWWN 115
4 -----LLPMLEMLLAQAWQSYSQRNSSLKDIDIARENNPDWIL 102
36 -----TRNKRLRRL-----STAMLTVPMLTM-----FASGAMAEQELNGHKPPVSTG 43
16 -----D-----ARAKLEMALSLT-----QPTGAVDP-----HDTSWFE 58
29 -----MKT-----EQTPWWK 10
31 -----MEKQWWK 7
30 -----MQQVPD-----SVHLTAPT-----AHTHWWR 21
23 -----M-----SQT PWWR 8
17 -----MKSLVVVVLLL-----AVGLGAGQ-----NNKGWWK 26
35 -----AREIIFWLI-----IVATLAI-IAAT-----IAIIAIS P-----KCLDWWQ 121

20 ET--VWYQIFPERFANGVRQNDPAN-----VQPWGA---GRVHRDSFYGGDL 178
21 DQ--IFYQIFPDRFARSLPREAEQDHVYYHHAAGQE IILRDWDEPVTAQAGGSTFYGGDL 179
18 ---MKNKVQLITYADRL-----GDGTI 19
NI NE--MIYSVFVRNYS-----EAGNF 28
34 KG--PLYQVGDPA--TFQED-----GAGNI 136
4 SNKQVGGVCYVDL-----FAGDL 120
36 SG--VFYEIYINSFYDSNGD-----GHGDL 66
16 TA--VFYEV MVRSFADSSGD-----GIGDL 81
29 KA--VVYQIYPKSFNDTTGN-----GVGDL 33

```

```

31 ES--VYQIYPRSFMDNSGD-----GIGDL 30
30 HA--VIYQIYVRSFADSNGD-----GEGDL 44
23 GA--VIYQIYPRSFLDNSGD-----GVGDL 31
17 NA--IFYQVYPRSFMDNSD-----GIGDL 49
35 RS--PMYQVYPKSFKDSNND-----GSGDL 144

```

\* :

CSR VI  
β2

```

20 PGITAHLLDDLA-----ALGVNGLYLCPIFTSPS-----NKKDTIDHFEIDPHFG 223
21 DGISEKLPYLK-----KLGVTALYLNPFVKAPS-----VKKDTEDYRHVDPQFG 224
18 KSMTDILRTRF-----DGVYDGVHILPFFTPFD-----GADAGFDPIDHTKVDERLG 66
NI AGVTADLQRIK-----DLGTDILWLLPINPIGEVNRKGTLSGSAIKDYRGINPEYG 80
34 QSIEKRIESLS-----SLKVKGLIIGPIHVTKK-----DQIGETQLTDIDPNYG 180
4 KGLKDKIPYFQ-----ELGLTYLHLMPLFKCPE-----GKSDGGYAVSSYRDVNPALG 168
36 KGITQKLDYLDNGKSHSGKDLQVSGLWLMPLNPSPS-----Y-KKDVTDYYQVDPQYG 119
16 AGLTEHLDYLQ-----WLGVDCLWLPFFASPM-----TDGGYDVADYRAISPDLG 127
29 NGIIEKLDYDK-----TLQVDVLWLTPIYDSPQ-----HDNGYDIRDYYSIYPEYG 79
31 RGIISKLDYDK-----ELGIDVIWLSPVYESPN-----DDNGYDISDYCKIMNEFG 76
30 NGIRERLPALV-----SLGVDAIWLTPEFYVSPL-----ADGGYDVADYRDVDPFRFG 90
23 PGIIAKLDYIS-----GLGVDAIWISPEFKSPM-----ADFGYDISDYRAVDPLFG 77
17 KGIKDKLSHFY-----ESGITAIWLSPINRSPM-----VDFGYDISDFKVDVPIFG 95
35 KGVQEKIDHFL-----YLNKIKVWVAPFYKSSL-----KDFNYAVDDFMEVDPTFG 190

```

:: : : : \* . : \*

CSR I  
β3

```

20 TKADFQALVDGAHARGMRVMLDAVFNFHFGES-----PQWQDVIKNG-----EQSRF 270
21 GDGALLRLRHNTQQLGMRLVLDGVFNHSGDSH-----A-WFDRHNRGTGGACHNPESPW 277
18 SWDDVAELSK-----THNIMVDAIVNHMSWES-----KQFQDVLAK-----GEESEY 108
NI TLADFKALTDRAHELGMKVMLDIVNHTSPDSVLATEHPEWIFYHDADG----- 128
34 TKEQFASLLEAARKKSIQIILDLPNYHS-EK-----SWFEKTERE----- 220
4 TIGDLREVIAALHEAGISAVVDFIFNHTSNEH-----EWAQRCAAG-----DPLFD 214
36 SLNDFRTLMEKAHRKGVKVMIDLIINHSSSDH-----PWFKEASAN-----PQSKY 165
16 TLSEFGDFIDKAHDRGIRIIDFVMNHTSDHH-----PWFEESSRH-----PDGPY 173
29 TMEDFERLVSEAHKRDLKVVMDLVVNHTSTEH-----KWFREAISS-----IDSPY 125
31 TMEDWDELLHEMHERNMKLMMDLVVNHTSDEH-----NWFIESRKS-----KDNKY 122
30 TLADFDALLATAHDLGLRVIIDIVPNHTSSAH-----RWFRRDALAA-----GPGSPE 137
23 SLADFDRLLEKAHGLGLKVMIDQVLSHTSIAH-----AWFQESRQD-----RSNPK 123
17 TIKDLEDLTAEAKQNLKVILDVLPNHTSDQH-----KWFQMSINNT-----NNNNTNKY 145
35 TMADEFESMISAMHDKGLKLIIDLIPNHTSNKH-----KWFQLSRN-----RTGKY 235

```

. : : \* : : .

```

20 ADWFH-----IHGWVPGRDP-----KTKRLNYETIAT 297
21 RDWYS-----FSDDGT-----ALDWL---G 294
18 YPMFLTMSSVFPNGATEEDL---A-----GIYRPRPGLPFTHYKFAGKTRLVWVSF 156
NI -----QLTNKV-----GD 136
34 -----SI-----VD----- 224
4 NFYYI-----FPDRRMPDQYDRTLREIFPD-----QHPG-GFS-----QLEDGRWVWTTF 258
36 HDYYV-----WADENTDLEE-----KGSWGQQIWHKNP-----NGEGYFYGTFF 203
16 GDFYV-----WRDNP---DG-----YPDARIIFIDTETSNTWTFDP---VRGQYFWHRF 215
29 RDFYI-----WKKPQ---ENG-----SVPT-NWESKFGGSAWELDE---ASGQYYLHLF 167
31 RDYYI-----WR-PG---KEG-----KEPN-NWGAASFSGSAWQYDE---MTDEYYLHLF 163
30 RDRYV-----FRPGRGENGE-----LPPN-NWQSFGGPAWTRVTEPDGTPGEWYLHLF 185
23 ADWYV-----WADPR---EDG-----TPPN-NWLSLFGGVAWQWEP---RREQYYLHNF 165
17 KDYYI-----WVDPVKDDKG-NPIKDKYPN-NWLSVFNGTGWTFHE---GRKQFYFHQF 194
35 ADYYI-----WHDCMQTGG-----LVVPPN-NWVSFYGNSAWEYDD---TRKQCYLHQF 280

```

CSR V

CSR II

β4

```

20 GAAMPKVNITQNPVQAYL-----IDVTKYWIEQFGIDAWTFDVADEVTHG----- 342
21 YASLPKLLIYQSESLVNEIYRGEDSIVRHWLKPWNMDGWELDVVHMLGEAGGARNN---- 350
18 TPCQVDILTDSDKGWEYL-----MSIFDQMA-ASHVSYIRLDAVGYGAKEAGTSCFMTPK 210

```

|    |          |            |       |            |         |             |            |            |     |
|----|----------|------------|-------|------------|---------|-------------|------------|------------|-----|
| NI | WSDVVKDL | YGHHELWQYQ | ----- | IDTLLYWS-Q | FVDGY   | CDVAPL      | VPLD       | -----      | 179 |
| 34 |          |            |       | FEDNV      | -----   | TEAVNVWLERG | VGGIYFGDSE | -----      | 250 |
| 4  | NSFQWDLN | YSNPWVFRAM | ----- | AGEMFLA    | NLGV    | DLMDAVAF    | LWKQMG     | TSCENLP    | 311 |
| 36 | WSGMPDLN | FDNPEVRKEM | ----- | IKVGYWL    | -QQGADG | FELDAAMH    | LFRGQT     | KDGADKN    | 256 |
| 16 | YSHQPDNL | YENPKVLAEM | ----- | LDALRFWL   | -GFGVDG | FELDAVPY    | LVEEEGT    | NCE        | 265 |
| 29 | DVTQADLN | WENEEVRKHV | ----- | YDMMHFWF   | -EKGIDG | FELDVINL    | LISKDQR    | FPNAEEG    | 220 |
| 31 | SKKQPDNL | WDNEKVRQDV | ----- | YEMMKFWL   | -EKGIDG | FELDVINF    | LISKEEGL   | PTVETEE    | 217 |
| 30 | DVEQPDNL | WENPEVRAEF | ----- | ADILRFWL   | -DRGVDG | FELDVAHG    | MIKDPAL    | PDIAEQ     | 239 |
| 23 | LVDQPDNL | FHNAEVQOAT | ----- | LDNVRFWL   | -DRGVDG | FELDAINF    | CFHDAQ     | LRDNP      | 219 |
| 17 | YKQQPDNL | YRNSDVREEM | ----- | KNIMKFWL   | -DKGIDG | FELDAVPH    | LFE        | SANISLDEPP | 247 |
| 35 | KKEQPDLD | FNNPDVNEEI | ----- | LNI IKFWL  | -EKGVDG | FELTNSAK    | FLEAEHL    | RDEPQVN    | 332 |

CSR III

$\beta$ 5

|    |  |  |  |  |  |                             |                          |                 |                                       |
|----|--|--|--|--|--|-----------------------------|--------------------------|-----------------|---------------------------------------|
| 20 |  |  |  |  |  | FWRALCGALRAIKPDV            | YLLGES                   | HSSQ            | 364                                   |
| 21 |  |  |  |  |  | MQHVAGITEAAKETQPEAY         | IVGEH                    |                 | 374                                   |
| 18 |  |  |  |  |  | TFKLI                       | SRLREEGVKR               | GLE             | 228                                   |
| NI |  |  |  |  |  | FWLEARKQVNAKYPETL           | WLAE                     | SAGS            | 206                                   |
| 34 |  |  |  |  |  | NFPNASSFLSEWGNMT            | -AN                      | YSKEGKPR        | VLLL 285                              |
| 4  |  |  |  |  |  | QAHALIRAFNAVMRIAAPAV        | FFKSE                    |                 | 338                                   |
| 36 |  |  |  |  |  | IAWWNEFRSEMEKVNPNV          | YLAGE                    |                 | 281                                   |
| 16 |  |  |  |  |  | NLPGTHDILKQVRKMVDEEF        | PGRILLCE                 |                 | 296                                   |
| 29 |  |  |  |  |  | DGRSFYTDGP                  |                          | RVHEFLHEMNEKVF  | SHYDS-MTVGEMSS 258                    |
| 31 |  |  |  |  |  | EGYVSGHKHFMNGP              |                          | NIHKYLHEMNEEVLS | HYD-IMTVGEM 259                       |
| 30 |  |  |  |  |  | KADML                       |                          | DG-HTRL         | PFYFDQD-GVHEIYREWRAIVDSYPGERALVAE 284 |
| 23 |  |  |  |  |  | ADKRVGRGFSADNPYAYQYHYFNNTQ  | PENLPFLERLRGLLDSYPGAVSL  | GEISS           | 274                                   |
| 17 |  |  |  |  |  | LGKLN                       |                          | LSLHASLNHTLTKDQ | PETYELVKERDFVDNYAEENKR-DEIVLLTEAY 301 |
| 35 |  |  |  |  |  | LQNPDTISNYSELFHDYTTTQVGMHDI | IRNFRQTINKYSREPGRYRFMGTE | SNDQ            | 390                                   |

|    |  |  |  |  |  |                            |  |                 |             |               |                     |                 |
|----|--|--|--|--|--|----------------------------|--|-----------------|-------------|---------------|---------------------|-----------------|
| 20 |  |  |  |  |  | SLVGN                      |  | GQFNAVMN        | PL-TQPILALF | N-G           | QLNPEDYVGKT         | 406             |
| 21 |  |  |  |  |  | FGDARQWLQA                 |  | DVEDAAMN        | RGFTFPLWGFL | ANTDI         | SYDPQQIDAQT         | 420             |
| 18 |  |  |  |  |  | ILIEVHSYKK                 |  | QVEIASKVDRVYDFA |             | LPPLL         | LHALSTGHVE          | 269             |
| NI |  |  |  |  |  | IEELRSQGYTGLSDSELYQAFDMTYD |  | D               |             | VFGDFKDYWQGRS |                     | 248             |
| 34 |  |  |  |  |  | STSTVHNNLAGPS              |  | NETVQGTLEFR     |             | FLDAE         | NKK                 | NFSS 316        |
| 4  |  |  |  |  |  | VHPDQVVQYIGQ               |  | DECQIGYNPL      |             | QMAIL         | WNTLATREV           | 375             |
| 36 |  |  |  |  |  | DKPETIAPYYGP               |  | LHSLFNFD        |             | LGGTI         | LNSVKNGRDQGIATFAEKT | 325             |
| 16 |  |  |  |  |  | WPHDVVEYFG                 |  | D-NDECQMAFHFP   |             | VMPRL         | YMGVA               | RHTR 332        |
| 29 |  |  |  |  |  | TVDHCIRYTNPD               |  | NKELDMTFSFH     |             | HLKVD         | YPNGE               | KWALAPDFDLK 302 |
| 31 |  |  |  |  |  | TTEEAKLYTGEE               |  | RKELQMVQFE      |             | HMDLD         | SGEGG               | KWDVKPCSLLT 303 |
| 30 |  |  |  |  |  | ENAERVARYLRP               |  | DELHQAFNFE      |             | YLTAD         | WDA                 | T 316           |
| 23 |  |  |  |  |  | DSLATTAEYTAQ               |  | GRLHMGYSFE      |             | LLVQD         | YSAA                | Y 306           |
| 17 |  |  |  |  |  | SSENLTKYYEVG               |  | SNVPFNFK        |             | FITDA         | NSSS                | TPEQ 335        |
| 35 |  |  |  |  |  | AAVDKTMLYYGNS              |  | FIQEADFPLNA     |             | LFDLN         | KANI                | DGAS 428        |

CSR IV

$\beta$ 7

|    |  |  |  |  |  |                         |  |              |                      |                           |                   |     |
|----|--|--|--|--|--|-------------------------|--|--------------|----------------------|---------------------------|-------------------|-----|
| 20 |  |  |  |  |  | NLELM                   |  | MYRQ         | P-NQQAMFNALDTHDTPR   |                           | LLT               | 435 |
| 21 |  |  |  |  |  | CMAWMDNYRAGLSH          |  | Q-QQLRMFNQLD | SHDTAR               |                           | FKT               | 454 |
| 18 |  |  |  |  |  | PVAHWTDIRPNN            |  |              | AVTVLDTHDGIG         |                           | VIDIGSDQLDRSLKGLV | 310 |
| NI |  |  |  |  |  | VERYVDLLQRQDATFP        |  | GNYVKMRFL    | ENHDNAR              |                           | MMS               | 283 |
| 34 |  |  |  |  |  | LGATIKQYVAET            |  |              | GILGNSWMV            | GAPQMRH                   | LAS               | 347 |
| 4  |  |  |  |  |  | LLHQALTYRHNLPEHTAWVNYVR |  | SHDDIG       | WTF                  | FADEDAAYLGISGYDHRQFLNRFFV | 431               |     |
| 36 |  |  |  |  |  | LQ-LYKSYN               |  |              | KAALDAPFLSNHDQTR     |                           | VMS               | 352 |
| 16 |  |  |  |  |  | EAITTILASTPPVPOGCQWAT   |  | FLRNHDEL     | T                    |                           | LEMVTEDDRQYMWREYA | 379 |
| 29 |  |  |  |  |  | LKEILSDWQT              |  |              | GMHAGGGWNALFWCNHDQPR |                           | VVS               | 335 |
| 31 |  |  |  |  |  | LKENLTKWQK              |  |              | ALE-HTGWN            | SLYWNHDQPR                | VVS               | 335 |
| 30 |  |  |  |  |  | LRAVVDRSLA              |  |              | ANNAVGA              | PTTWVLSNHDVTR             | HVT               | 349 |
| 23 |  |  |  |  |  | IRDTVSRLEA              |  |              | TMLEGWPCWAI          | SNHDVVR                   | AVT               | 337 |
| 17 |  |  |  |  |  | FKVIIDNWIKGT            |  |              | P-QNNV               | PNVWVGNDRVR               | VGT               | 367 |
| 35 |  |  |  |  |  | IFSMVDLWMMKAM           |  |              | P-SGKW               | PNWVGGPSSSR               | IAS               | 460 |

|    |                                                      |     |
|----|------------------------------------------------------|-----|
| 20 | -----TLH-----G                                       | 439 |
| 21 | -----LLG-----R                                       | 458 |
| 18 | PDEDVDNLVNTIHANTHGESQAATGAAASNLD-lyQVNSTYYSALG-----C | 356 |
| NI | -----L-----MH                                        | 286 |
| 34 | -----MV                                              | 349 |
| 4  | NRF-----D-----GSFARGVPFQYNPSTGDCRVSGTAAALVGLAQDDPH   | 471 |
| 36 | -----ELG-----G                                       | 356 |
| 16 | P-----DPRMRLNLGIRRR---LAPLMGN                        | 400 |
| 29 | -----RYG-----DDGAY                                   | 343 |
| 31 | -----RFG-----NDGMV                                   | 343 |
| 30 | -----RFG-----GGAQ                                    | 356 |
| 23 | -----RWG-----GAQA                                    | 344 |
| 17 | -----RYP-----                                        | 370 |
| 35 | -----RVG-----                                        | 463 |

CSR VII

$\beta 8$

|    |                                                             |     |
|----|-------------------------------------------------------------|-----|
| 20 | QLTKFKSALTLLMLLPgSPCIYYGTEVAMAGGA-----                      | 473 |
| 21 | DIARLPLAVVWLFTWPGVPCIIYYGDEVGLDGKN-----                     | 492 |
| 18 | NDQHYIAARAVQFFLPGVPQVYYVGALAGKNDMELLRKTNN-----              | 397 |
| NI | SKAEAVNNLTWIFMQRGIPLIYNGQEF LAEHQPSLFDRDTM-----             | 327 |
| 34 | NENLLRVYQLLLFTLPGTPI SLYGDEI GLKDL SGLAAQ-----              | 387 |
| 4  | AVDRIKLLYSIALSTGGLPLIYLGDVGTLNDDVWSQDSNK-----               | 512 |
| 36 | DVRKAKLAASILLTLPGQPFLYYGEEIGMKGEKPD-----                    | 391 |
| 16 | DPDKIRLMNAMLLSLPGSPVLYYGDEI GMGDDIW-----                    | 434 |
| 29 | RVKSAKMLATAIHMMQGTPIYQGEELGMTNPKFTDISSYRDVESLNMYHAFK-EKGMAD | 402 |
| 31 | RIESAKMLATVLHMMKGTPIYQGEELGMTNVRFESIDEYRDIETLNMYKEKVMERGED  | 403 |
| 30 | GLARARAALLMLALPGSVYLYQGEELGLPEVTLPPEALQD-----P              | 399 |
| 23 | TPAFARMVVALLCSLRGSICLYQGEELGLSEAEV-AFEDLQD-----P            | 386 |
| 17 | -GR-ADHMIMLEMILPGVAVTYYGEEIGMVDNNTTIY--KYD-----             | 407 |
| 35 | -RQYVNVMMNMLLLTLPGTPTTYYGEEELGMEDGSPQV--STEN-----           | 502 |

\*

|    |                                                           |     |
|----|-----------------------------------------------------------|-----|
| 20 | -----PDMRCMNWQPDEQ-----                                   | 487 |
| 21 | -----PFCRKPFPWQVEKQ-----                                  | 506 |
| 18 | -----GRDINRHYYST-----T-----                               | 408 |
| NI | -----VADRHGDVTPLIQKLVTIKQLPLLRAADYQLAVVEEGIVKITYRAAGEALTA | 379 |
| 34 | -----LSGPIMQWGEVSV-----SN---NSP-----                      | 405 |
| 4  | -----SDDSRWAHRPR-----                                     | 523 |
| 36 | -----EYLREPMPRWYKGDG-----PGQTT-----                       | 410 |
| 16 | -----LHDRDGVTPMQWTADPS-----AGFST---ATP---DKF              | 463 |
| 29 | QDITAILQAKSRDNSRTPVQWDATEN-----GGFTT---GTP-----           | 436 |
| 31 | EKVMQSIYIKGRDNARTPMQWDDQNH-----AGFTT---GEP-----           | 437 |
| 30 | TWKRSGYTERGRDGCSTPMPWTDAP-----PFGFGCSA---ERS-----         | 436 |
| 23 | YGITFWPTFKGRDGCSTPMPWTDAP-----SA--GFTS---GKP-----         | 420 |
| 17 | -----VRDGCSTPMPWTDAP-----AGFSK---IAENLLEKN                | 437 |
| 35 | -----PQEYNPTEYPEKTPMQWDSSSN-----AGFSE---AN---RT           | 533 |

|    |                                                           |     |
|----|-----------------------------------------------------------|-----|
| 20 | -----EQQVRQFVTRLIKFRQQADFLATSQLTWTIDGHC                   | 522 |
| 21 | -----DTALFALYQRMIALRKKSQALR-----HGGC                      | 532 |
| 18 | -----AEIDENLKRVPVKALNALAKFRNELDAFD-----GTF                | 440 |
| NI | WIPLK-----GQ---VTAVATKLAAGSY---QNLITDGP---TEVV-----DGKL   | 415 |
| 34 | ---QI--A---TDVNAVNTFKGQDADKGSFLNVYRKLSDLRGKERSLL-----HGDF | 449 |
| 4  | -----YNEALYAQRNDPSTAAGQIYQGLRHMIAVRQSNPRFD-----GGRL       | 564 |
| 36 | WEKP---KYNTGE---VSVEAQLRDDDSLLESYRTLIRLREEHDALR-----SDSL  | 455 |
| 16 | FLPLLADPYSPQQ---VNVTDQMAPGSLLVWMSMLTTRRQFPVFG-----RGEF    | 511 |
| 29 | WIPV---AGNYRE---INAEAAALRDQNSVFYHYQKLIQIRKMYDIVT-----EGTY | 481 |
| 31 | WITV---NPNYKE---INVKQAIQNKDSIFYYYKKLIELRKNNEIVV-----YGSY  | 482 |

|    |                                                                |     |
|----|----------------------------------------------------------------|-----|
| 30 | WLPV---PAEWR---LTREVQERDPDSTLSLYKKALRLRRELLLP-----EDAL         | 481 |
| 23 | WLPL---AASHRA---AAVSVQQDDAHSVLRVRAFLAWRKEMPALR-----EGSI        | 465 |
| 17 | WLPV---HTSYKSG---LNLEQEKKDSISHYHLYTNLTALRKRDLK-----GNF         | 482 |
| 35 | WLSV---NPDYEA---VNVEAQKNEQYSTLNLYRELNHLRNNELPLH-----RGWL       | 578 |
| .  |                                                                |     |
| 20 | LILTR-TDVE-----QTIQGRFNLG--AQAVSTVSGVSPILT-AGITA---            | 561 |
| 21 | QVLYA-EDNVVVFVRVLNQ-----QRVLVAINRG--EA-CEVVLPASPFLN-AVQWQ---   | 579 |
| 18 | SYTTDD-DTSISFTWRGETS-----QA---TLTFE--PKRGLGVDNTTP--VAMLEWED--- | 486 |
| NI | TVD--GQPVLIKVVTNTAVT-----KVADQSN-----                          | 440 |
| 34 | ALLYNS-DQAISFLRSWDQNE-----RYVTALNFNYEGEAEFLKQDGDKEL---PEQGTV   | 501 |
| 4  | VTFNTNKKHIIIGYIRN-----NALLAFGNFS--EYPQVTAHTLQAMP----FKAHD      | 610 |
| 36 | QPIQAGSASVTAFKRTSDK-----ESLYVYHNLS--GEPVTLQMKDFD----KGKWKVVF   | 504 |
| 16 | IDMGGQNDAVLSFLRVLDDDKHGSQRLLCLNLS--PEEQDVLV--YLPDDAGTKPVS---   | 565 |
| 29 | EIIAKDDPNIFAYLR-----HGSNEKLLVINNFY--GTEAAF---TLPDSLAPDEWKAEV   | 531 |
| 31 | DLILENNPSIFAYVR-----TYGVEKLLVIANFT--AEECIF---ELPEDISYSEVE--L   | 530 |
| 30 | HWADAP-QNVLAFR-----EPGFT---CAVNFG--ADPVTL---PFEDEV-----        | 518 |
| 23 | AFYDTA-EPVLMFRR-----EHAGQVLLAFNLS--ADPAEL---ALPAGE----WEQID    | 510 |
| 17 | TIEIL-NKTVLAVVRQSEEE-----AVSLLINF--KNNTIVDISKLVNKRNNAK-----I   | 530 |
| 35 | CYTWS-DNVFAYVRELDGLNK---VFMMVLNFG--QAWTINLRQAVPDLPGAEK-----I   | 628 |
| .  |                                                                |     |
| 20 | -----NE-----MAPGGFELTVA-----                                   | 574 |
| 21 | -----CKEGHGQLTDGILALPAISATVWMN-----                            | 604 |
| 18 | -----SAGDHRSDDLIANPPV-VA-----                                  | 504 |
| NI | -----                                                          | 440 |
| 34 | VLSS-NPQRKDGDTVSLKSL-K-----LGAGEALLLKYPYSG-----                | 536 |
| 4  | -----LIGGKTVSLNQDLTLQP-YQVMWLEIA-----                          | 636 |
| 36 | STSK---DV---KVKKGTITIPA-YSSLITKEDRKS-----                      | 533 |
| 16 | LLTS---QAMAPIAANGEFHDTLPA-WGFAWLDLSKGSDEHESE-----              | 605 |
| 29 | LLT---NDEARE-GLQNMTLR-PY-ESIVYR-LTKPC-----                     | 561 |
| 31 | LIHN---YDVENG-PIENITLR-PY-EAMVFK-LK-----                       | 558 |
| 30 | VLSS---GPVE---QDGTHLVLPD-DTAVWL-RQ-----                        | 544 |
| 23 | VPGV---ELGA---MDGGHLRLAG-HAVVAA-VGRG-----                      | 538 |
| 17 | YTSSVNSNLTVNQTVNPAI-NIPG-DTSIIVDSSTSGATIVN--YS--IMIFLSAVFIS    | 584 |
| 35 | RLSTEGSRV--GKAVSTDSIQTPG-EGL-ILEYKTNKPVHVRDTEFKDKCFISEKACYTS   | 684 |
| .  |                                                                |     |
| 20 | -----                                                          | 574 |
| 21 | -----                                                          | 604 |
| 18 | -----                                                          | 504 |
| NI | -----                                                          | 440 |
| 34 | -----                                                          | 536 |
| 4  | -----                                                          | 636 |
| 36 | -----                                                          | 533 |
| 16 | -----                                                          | 605 |
| 29 | -----                                                          | 561 |
| 31 | -----                                                          | 558 |
| 30 | -----                                                          | 544 |
| 23 | -----                                                          | 538 |
| 17 | FFQR-----                                                      | 588 |
| 35 | AFDLLYNSC                                                      | 693 |

**Fig. S1.** Sequence alignment of the  $\alpha$ -amylase representatives of thirteen different GH13 subfamilies with focus on the intermediary group with MPDLN as CSR V (Majzlová et al., 2013). The sequences from GH13\_4 (*Neisseria polysaccharea*, accession Q9ZEU2), GH13\_16 (*Propionibacterium freudenreichii* subsp. *Shermanii*, A1XGB1), GH13\_17 (*Apis mellifera*, Q25BT8), GH13\_18 (*Bifidobacterium adolescentis*, Q84HQ2), GH13\_20 (*Lactobacillus plantarum* WCFS1, F9URM8),

GH13\_21 (*Escherichia coli*, P21517), GH13\_23 (*Xhantomonas campestris*, Q76LB0), GH\_29 (*Bacillus subtilis*, P39795), GH13\_30 (*Thermonospora curvata*, Q60027), GH13\_31 (*Bacillus cereus*, P21332), GH13\_34 (*Xenopus leavis*, Q7ZYR3), GH13\_35 (*Xenopus leavis*, Q32NL8), GH13\_36 (*Paenibacillus polymyxa* E681, E0RLH8) subfamilies and Lp\_0179 (NI, not included in a subfamily, F9USZ) are represented. Alignment was done using the program ClustalOmega. Residues that are identical (\*), conserved (:), or semiconserved (.) in all sequences are indicated. Dashes indicated gaps introduced to maximize similarities. The GH13 three domains are highlighted in blue (domain A), green (domain B), and yellow (domain C). The catalytic triad is highlighted in pink. The seven GH13 CSRs are boxed. Conserved residues in amylolytic enzymes are highlighted in red (Lee et al., 2002)
