# Supplementary material for: Unravelling the diversity of glycoside hydrolase family 13 α-amylases from Lactobacillus plantarum WCFS1
Source: PubMed Central journal article supplement (PMC6815381; doi:10.1186/s12934-019-1237-3), 2019-10-26
Supplement: 12934_2019_1237_MOESM2_ESM.pdf [file 12934_2019_1237_MOESM2_ESM.pdf]

Figure S2

|     |                                                                   |     |
|-----|-------------------------------------------------------------------|-----|
| AAC | --MELVWQHRWAADAYPLDLSTMVIVLRVARCTPAQRVVRVHFVGDREPDFQ-----         | 49  |
| LPL | -MQLAGIRHRPESED TAVLAAHQVRLQRTARD-DVAQVEILFADSYLWQEGTTA-----      | 53  |
| KOX | MITISSLSHSAKSADSYAYNKETLHIRFRFTVKG-EVAKVSLWIGDPYQWEEGGLDGGNLG     | 59  |
| TVU | -MLLEAIFHEAKGSYAYPISETQLRVRLRAKKG-DVVRCEVLYADRYASPEEE-----        | 51  |
| AFL | -MLKEAVYHRPTDQFAYAYDDKTLHIRLRLTKKS-DVHAVSLLHGDPYCWEDRQWQ-----     | 53  |
| GCA | -MFKEAIYHRPKDNFAYAYDEKTLHIRLRLTKKD-DVEAVHLLYADPYEWKDGWVQ-----     | 53  |
| TSP | -MRKEAIHHRSTDNFAYAYDSETLHLRLQTKKN-DVDHVELLFGDPYEWHDGAWQ-----      | 53  |
| BST | -MRKEAIYHRPADNFAYAYDSETLHLRLRLTKKD-DIDRVELLHGDPYDWQNGAWQ-----     | 53  |
| BSP | -MFLEAVYHRPRKNWSYAYNGTTVHLRIRTKKD-DMTAVYALAGDKYMW DHT-----        | 50  |
| LSP | MIMLEAVYHRMGQNSYAYNDSTLHIRIRTKRD-NVPRIDLHCGEKYDPEKY-----          | 51  |
|     | : : : : : : : : : : : *                                           |     |
|     |                                                                   |     |
| AAC | -----NSSEARRYSGDGTDFWFTCRVAAPTRRLKYAFVLSSTGRAVYLGEGGLA            | 99  |
| LPL | -----LERRIMQPLATQGNQYQTTLLVPTNRVVAFLITDTIGATVGYGEGGFF             | 104 |
| KOX | GSDAHGWSGGNEVHMEKEGQSESYDHWFAAFTPKRRSRYGFILYGNNGEKLLFGERRCV       | 119 |
| TVU | -----LAHALAGKAGSDFDYFEALLECSTKRKVKYVFLLTGPOGEAVYFGETGFS           | 102 |
| AFL | -----FTKTEMTKSGDALFDYWWVAISPPYRRLRYGFELVSGN-ERC VYTEKGGF          | 103 |
| GCA | -----LNRAPMVKSGSDDLFDYWFIEVIPPYRRLRYGFELTSGN-EKIVYTEKGFY          | 103 |
| TSP | -----FQTMPMRKTGSDGLFDYWLAEVKPPYRRLRYGFVLRAGG-EKLVYTEKGFY          | 103 |
| BST | -----FQMMPMRKTGSDELFDYWFAEVKPPYRRLRYGFVLYSGE-EKLVYTEKGFY          | 103 |
| BSP | -----MEYVPMTKLATDELFDYWECEVTPPYRRVKYGFLLQQGH-EKRWMT EYDFL         | 100 |
| LSP | -----KETIPMERMASDGLFDYWQAAVQPRYRRLVYVFALHSDNGDAVYFMEKGGF          | 102 |
|     | : : . * * * : *                                                   |     |
|     |                                                                   |     |
| AAC | DTL-----DAVQPFQYPIIHSRVLAVPDVWGHAVAYQIFPDRFAVGEQQLV-RP            | 148 |
| LPL | DDV-----ATNWQTVGNVYFHMPLYMHVSDAELPPAVWKETVWYQIFPERFANGVRQNDPAN    | 159 |
| KOX | DISKPPVAETELSNLSNFFCFPIINPGDVLSTPEWVKKTIWYQIFPERFCNGDPSISPEN      | 179 |
| TVU | A-----ERS---KAGVFQYAYIHRSEVFTTPEWAKEAVIYQIFPERFANGDPSLNPPG        | 152 |
| AFL | H-----EAPIDDIAYYFCFPFLNRIDVFHAPTWVKDTVWYQIFPERFANGDPSLNPKG        | 156 |
| GCA | H-----EAPTDDTAYYFCFPFLNKIDVFHAPTEWVKDTVWYQIFPERFANGNPAIDPEG       | 156 |
| TSP | H-----EAPSDDTAYYFCFPFLHRVDLFEAPDWVKDTVWYQIFPERFANGNPAISPKG        | 156 |
| BST | F-----EVPTDDTAYYFCFPFLHRVDLFEAPDWVKDTVWYQIFPERFANGNPSISPEG        | 156 |
| BSP | T-----EPPR-NPDRLEFYFPINPVDVFPQPAWVKDAIFYQIFPERFANGDTRNDPEG        | 152 |
| LSP | D-----QPPKVMYEGLFDFPYLNRQDVHTPPAWVKEAIFYQIFPERFANGDPSNDPEG        | 155 |
|     | * : : * * . : : * * * * : * * . *                                 |     |
|     | CSR VI                                                            |     |
|     | β2                                                                |     |
| AAC | TDPWDAR--PTPDSVFGGNLRGIVDKLPYLSDLGVNLMYLTPIFQAPSNEKMDTQDYFAV      | 206 |
| LPL | VQPWGAG-RVHRDSFYGGDLPGITAHLLDAA LGVNGLYLCPIFTSPSNEKMDTIDHFEI      | 218 |
| KOX | VQPWGTP--PDSKNFMGGDLQGIINKLDYLQDLGVNGLYLCPIFTANASNEKMDTVDYFNV     | 237 |
| TVU | TEQWAKDARPRHDSFYGGDLKGVIDRLPYLEE LGVTALYFTPIFASPSNEKMDTADYLA I    | 212 |
| AFL | TIPWGSA-DPTPTSFFGGDFAGIMERLDYLVELGINGIYFTPIFKASSNEKMDTIDYFEI      | 215 |
| GCA | TLPWASE-DPTPTSFFGGDLEGI IQHLDYLVDLGVNGIYLTPIFHAPSNEKMDTTNYFEI     | 215 |
| TSP | ARPWGSE-DPTPTSFFGGDLQGIIDHLDYLADLGITGIYLTPIFRAPSNEKMDTADYFEI      | 215 |
| BST | SRPWGSE-DPTPTSFFGGDLQGIIDHLDYLVDLGITGIYLTPIFRSPSNEKMDTADYFEV      | 215 |
| BSP | TLPWGSA-DPTPSCFFGGDLQGVIDHLDHLSK LGVNAVYFTPIFKATTNEKMDT EYFQI     | 211 |
| LSP | VQEWGGT--PSAGNFFGGDLQGVIDHLDYLSDLGVNALYFNPLFAATTNEKMDTADYMKI      | 213 |
|     | * . * * : : * : * * * * : : * * * * : : : :                       |     |
|     | CSR I                                                             |     |
|     | β3                                                                |     |
| AAC | DPAFGTLGDLQLLVREAHRLGIRVVLDVAVFNHSGFQFAPFQDVIARGTASPYWSWFFVQG     | 266 |
| LPL | DPHFGTKADFQALVDGAHARGMRVMLDAVFNHFGEQSPQWQDVIKNGEQSRFADWFH IHG     | 278 |
| KOX | DPHFGGNDRFKELVQKAHQRGMKVMLDAVFNHIGNQSPWLVDVVKNGDKSPYADWFWIKK      | 297 |
| TVU | DPQFGDLPTFRRLVDEAHRRGIKIILDVAVFNHAGDQFFAFRDV LQKGEQSRYKDWFFIED    | 272 |
| AFL | DPQFGDKPTFKRLVERCHQKIRVMLDAVFNHSGHFFAPFQDVLKHGEKSKYKDWFWH IHE     | 275 |
| GCA | DPHFQDKQTFKKLVDLCEKGI R VMLDAVFNHCGYYFAPFQDVLKNGEASKYKDWFWH IHE   | 275 |
| TSP | DPHFQDKETLKT LVKRCHEKGI R VMLDAVFNHCGYEFAPFQDVLKNGAASRYKDWFWH IRE | 275 |
| BST | DPHFQDKETLKTLDRCHEKGI R VMLDAVFNHCGYEFAPFQDVWKNGESSKYKDWFWH IHE   | 275 |



|     |                                                             |     |
|-----|-------------------------------------------------------------|-----|
| GCA | RRGKIITFMDASDES NHLIYTKTYLDETILVM--INNSSKEIDITVPLS-----LKG- | 552 |
| TSP | RRGDVAFLTADDEVNHLVYAKTDGNETVMI I--INRSNEAAEIPMPID-----ARG-  | 552 |
| BST | RRGEISFLHADDEMNYLIYKKTGDGETVLVI--INRSDQKADIPIPLD-----ARG-   | 552 |
| BSP | RTGTFKFLTAEKNSRQIAYLREDDQDTILVV--MNNDKAGHTLRCLSG-----M---   | 547 |
| LSP | RGSGLRFLPVLEHPQLLVYERWDDNERFLIM--LNNEDAPVNVVIPAA-----QPG-   | 551 |
|     | :                                                           |     |
|     | :                                                           |     |
| AAC | RKILIWEC DSTEGCGHDS-----RADGFHNQ-----                       | 578 |
| LPL | -----GVSPILTAGITANEMAPGGFELTVA-----                         | 574 |
| KOX | -----RTLSLTPFGFYIIGLDHKDIIS                                 | 598 |
| TVU | ---KTWLDCLTGEEVHGKQGQLKLTLPYQGMILWNGR----                   | 585 |
| AFL | ---KKLTDLWTKQFVSEENEWTVTLAPYGFMLFIVE-----                   | 586 |
| GCA | ---KWLVLNLTNEQFAAEAETLRAAIPYS-----                          | 579 |
| TSP | ---KWLVNLLTGERFAAEAETLCVSLPPYGFVLYAVESW----                 | 588 |
| BST | ---TWLVNLLTGERFAAEAETLCTSLPPYGFVLYAIEHW----                 | 588 |
| BSP | -----HSGPICGTTMS-----                                       | 558 |
| LSP | --ASWRVTNNGEPCAVVEESSIQAALPPYGYAILHAPIAGTAE                 | 591 |

**Fig. S2.** Sequence alignment of the  $\alpha$ -amylase family GH13\_20 representatives from *Alicyclobacillus acidocaldarius* (AAC) (accession Q9WX32), *Thermoactinomyces vulgaris* (TVU) (Q08751), *Klebsiella oxytoca* (KOX) (Q48398), *Bacillus* sp. I-5 (BSP) (Q59226), *Lysinibacillus sphaericus* (LSP) (Q08341), *Anoxybacillus flavithermus* (AFL) (Q5BLZ6), *Geobacillus caldoxylosilyticus* (GCA) (CoLZ63), *Thermus* sp. IM6501 (O69007), *Bacillus stearothermophilus* (BST) (P38940), and *Lactobacillus plantarum* WCFS1 (LPL) (F9URM8). Alignment was done using the program ClustalOmega. Residues that are identical (\*), conserved (:), or semiconserved (.) in all sequences are indicated. Dashes indicated gaps introduced to maximize similarities. The GH13 three domains are highlighted in blue (domain A), green (domain B), and yellow (domain C). The N-terminal domains are indicated in dark blue. The seven conserved sequence regions (CSR) found in GH13\_20 subfamily  $\alpha$ -amylases are also indicated. The residues of the GH13 catalytic triad (Asp-171, Glu-200, and Asp-227 in Lp\_0179) are highlighted in pink colour. Conserved residues in amylolytic enzymes are highlighted in red (Lee et al., 2002). The conserved VAnE and MPKLn motifs, in the CSR II and V respectively, are indicated in grey colour.
