# Supplementary material for: Unravelling the diversity of glycoside hydrolase family 13 α-amylases from Lactobacillus plantarum WCFS1
Source: PubMed Central journal article supplement (PMC6815381; doi:10.1186/s12934-019-1237-3), 2019-10-26
Supplement: 12934_2019_1237_MOESM3_ESM.pdf [file 12934_2019_1237_MOESM3_ESM.pdf]

**Table S1.** Concentrations (mg/mL) of the products after the enzymatic hydrolysis with Lp\_2757

| Substrate              | Products      | mg/mL reaction |       |
|------------------------|---------------|----------------|-------|
|                        |               | 24 h           | 48 h  |
| Starch                 | Glucose       | 1.5            | 2.1   |
|                        | Maltose       | 4.7            | 6.1   |
|                        | Maltotriose   | 0.4            | 0.3   |
| Amylose                | Glucose       | 2.7            | 3.6   |
|                        | Maltose       | 8.9            | 10.7  |
|                        | Maltotriose   | 0.8            | 0.5   |
|                        | Maltotetraose | 0.3            | 0.3   |
| Amylopectin            | Glucose       | 0.1            | 0.2   |
|                        | Maltose       | 0.8            | 1.2   |
| Pullulans              | Glucose       | 0.2            | 0.2   |
|                        | Maltose       | 0.4            | 2.5   |
|                        | Maltotriose   | 0.5            | 0.4   |
|                        | Maltotetraose | 0.3            | 1.7   |
| $\alpha$ -Cyclodextrin | Glucose       | 5.9            | 11.4  |
|                        | Maltose       | 30.4           | 36.8  |
|                        | Maltotriose   | 14.7           | 12.3  |
|                        | Maltotetraose | 4.2            | 5.4   |
| $\beta$ -Cyclodextrin  | Glucose       | 2.5            | 9.0   |
|                        | Maltose       | 13.4           | 26.1  |
|                        | Maltotriose   | 30.8           | 8.9   |
|                        | Maltotetraose | 7.5            | 3.0   |
| $\gamma$ -Cyclodextrin | Glucose       | 6.9            | 11.2  |
|                        | Maltose       | 23.5           | 28.9  |
|                        | Maltotriose   | 10.3           | 8.2   |
|                        | Maltotetraose | 3.6            | 5.6   |
| Acarbose               | Glucose       | 2.1            | 3.3   |
|                        | Maltose       | 1.3            | 1.8   |
|                        | Maltotriose   | 3.9            | 5.9   |
| Panose                 | Glucose       | 0.2            | 0.2   |
|                        | Maltose       | 0.3            | 0.4   |
| Maltopentaose          | Glucose       | 26.0           | 30.8  |
|                        | Maltose       | 157.4          | 160.4 |
|                        | Maltotriose   | 26.5           | 12.5  |
|                        | Maltotetraose | 4.5            | 2.8   |
| Dextrin                | Glucose       | 16.0           | 15.2  |
|                        | Maltose       | 65.0           | 58.0  |
|                        | Maltotriose   | 6.5            | 2.6   |
|                        | Maltotetraose | 5.1            | 4.8   |
